# Supplementary material for: Estimating the cost-effectiveness of a sequential pneumococcal vaccination program for adults in Germany
Source: PubMed Central journal article supplement (PMC5967715; doi:10.1371/journal.pone.0197905), 2018-05-24
Supplement: pone.0197905.s002.pdf [file pone.0197905.s002.pdf]

1 S1 Table. Model fits for serotype distribution IPD over time (incl. prognosis for next 5 years)

| Model <sup>a</sup>    | Formula                                         | AIC    | BIC    | Pred_2017 | Pred_2018 | Pred_2019 | Pred_2020 | Pred_2021 |
|-----------------------|-------------------------------------------------|--------|--------|-----------|-----------|-----------|-----------|-----------|
| <b>PCV13-7: 16-49</b> |                                                 |        |        |           |           |           |           |           |
| 1                     | $a * \exp(b * \text{Year})$                     | -21.17 | -21.79 | 0.218     | 0.183     | 0.153     | 0.128     | 0.107     |
| 2                     | $\exp(a + b / \text{Year})$                     | -19.71 | -20.34 | 0.235     | 0.211     | 0.192     | 0.176     | 0.163     |
| 3                     | $a * \text{Year}^b$                             | -20.71 | -21.34 | 0.227     | 0.197     | 0.173     | 0.153     | 0.136     |
| 4                     | $a * \text{Year}^b * \exp(c * \text{Year})$     | -19.2  | -20.03 | 0.215     | 0.178     | 0.147     | 0.121     | 0.099     |
| 5                     | $a * b * \log(\text{Year})$                     | na     | na     | na        | na        | na        | na        | na        |
| 6                     | $d + a * \text{Year}^b * \exp(c * \text{Year})$ | na     | na     | na        | na        | na        | na        | na        |
| 7                     | $c + a * \exp(b * \text{Year})$                 | na     | na     | na        | na        | na        | na        | na        |
| <b>PCV13-7: 50-60</b> |                                                 |        |        |           |           |           |           |           |
| 1                     | $a * \exp(b * \text{Year})$                     | -19.36 | -19.99 | 0.203     | 0.169     | 0.141     | 0.118     | 0.098     |
| 2                     | $\exp(a + b / \text{Year})$                     | -21.73 | -22.36 | 0.216     | 0.193     | 0.175     | 0.16      | 0.147     |
| 3                     | $a * \text{Year}^b$                             | -20.63 | -21.26 | 0.209     | 0.181     | 0.158     | 0.139     | 0.123     |
| 4                     | $a * \text{Year}^b * \exp(c * \text{Year})$     | na     | na     | na        | na        | na        | na        | na        |
| 5                     | $a * b * \log(\text{Year})$                     | na     | na     | na        | na        | na        | na        | na        |
| 6                     | $d + a * \text{Year}^b * \exp(c * \text{Year})$ | na     | na     | na        | na        | na        | na        | na        |
| <b>PCV13-7: 60-75</b> |                                                 |        |        |           |           |           |           |           |
| 1                     | $a * \exp(b * \text{Year})$                     | -28.08 | -28.71 | 0.268     | 0.239     | 0.213     | 0.19      | 0.17      |
| 2                     | $\exp(a + b / \text{Year})$                     | -28.78 | -29.4  | 0.279     | 0.26      | 0.244     | 0.23      | 0.219     |
| 3                     | $a * \text{Year}^b$                             | -29    | -29.62 | 0.273     | 0.25      | 0.229     | 0.211     | 0.196     |
| 4                     | $a * \text{Year}^b * \exp(c * \text{Year})$     | -27.11 | -27.94 | 0.276     | 0.255     | 0.237     | 0.222     | 0.209     |
| 5                     | $a * b * \log(\text{Year})$                     | na     | na     | na        | na        | na        | na        | na        |

|                                                                                                                                                                                                                                                                                                                                                                                                                                                                                                              |                                  |        |        |       |       |       |       |       |
|--------------------------------------------------------------------------------------------------------------------------------------------------------------------------------------------------------------------------------------------------------------------------------------------------------------------------------------------------------------------------------------------------------------------------------------------------------------------------------------------------------------|----------------------------------|--------|--------|-------|-------|-------|-------|-------|
| 6                                                                                                                                                                                                                                                                                                                                                                                                                                                                                                            | $d + a * Year^b * exp(c * Year)$ | na     | na     | na    | na    | na    | na    | na    |
| 7                                                                                                                                                                                                                                                                                                                                                                                                                                                                                                            | $c + a * exp(b * Year)$          | -27.43 | -28.26 | 0.277 | 0.257 | 0.241 | 0.229 | 0.219 |
| <b>PCV13-7: 75+</b>                                                                                                                                                                                                                                                                                                                                                                                                                                                                                          |                                  |        |        |       |       |       |       |       |
| 1                                                                                                                                                                                                                                                                                                                                                                                                                                                                                                            | $a * exp(b * Year)$              | -36.2  | -36.82 | 0.263 | 0.24  | 0.219 | 0.2   | 0.183 |
| 2                                                                                                                                                                                                                                                                                                                                                                                                                                                                                                            | $exp(a + b / Year)$              | -31.22 | -31.84 | 0.271 | 0.256 | 0.244 | 0.233 | 0.224 |
| 3                                                                                                                                                                                                                                                                                                                                                                                                                                                                                                            | $a * Year^b$                     | -33.77 | -34.4  | 0.267 | 0.249 | 0.232 | 0.218 | 0.205 |
| 4                                                                                                                                                                                                                                                                                                                                                                                                                                                                                                            | $a * Year^b * exp(c * Year)$     | -35.61 | -36.45 | 0.258 | 0.231 | 0.206 | 0.182 | 0.161 |
| 5                                                                                                                                                                                                                                                                                                                                                                                                                                                                                                            | $a * b * log(Year)$              | na     | na     | na    | na    | na    | na    | na    |
| 6                                                                                                                                                                                                                                                                                                                                                                                                                                                                                                            | $d + a * Year^b * exp(c * Year)$ | na     | na     | na    | na    | na    | na    | na    |
| 7                                                                                                                                                                                                                                                                                                                                                                                                                                                                                                            | $c + a * exp(b * Year)$          | na     | na     | na    | na    | na    | na    | na    |
| <p><sup>a</sup> To predict indirect effects of PCV13 vaccination for the next 5 years, we analyzed data from the National Reference Laboratory (NRZ) on Streptococcal Diseases (38). Data show the observed ST-distribution for the periods 2010/11-2015/16 for PCV7 und PCV13. We tested different models to evaluate the effect of PCV13 and used the model with the best fit in the age group. Model fits confirmed our assumption that the final level of indirect effect was reached after 5 years.</p> |                                  |        |        |       |       |       |       |       |
