# Supplementary material for: Estimating the cost-effectiveness of a sequential pneumococcal vaccination program for adults in Germany
Source: PubMed Central journal article supplement (PMC5967715; doi:10.1371/journal.pone.0197905), 2018-05-24
Supplement: pone.0197905.s003.pdf [file pone.0197905.s003.pdf]

1 **S2 Table. Development of herd effect by year of modelling (cumulative in %) based on ST-specific IPD data**

| Year of modelling                                      | Age group (years) <sup>a</sup> |       |       |       |       | Source           |
|--------------------------------------------------------|--------------------------------|-------|-------|-------|-------|------------------|
|                                                        | 18-49                          | 50-59 | 60-64 | 65-74 | 75-99 |                  |
| 1                                                      | 0                              | 0     | 0     | 0     | 0     | [1] and S1 Table |
| 2                                                      | 81.3                           | 88.2  | 80.4  | 80.4  | 74.8  |                  |
| 3                                                      | 88.7                           | 92.8  | 88.0  | 88.0  | 84.1  |                  |
| 4                                                      | 94.8                           | 96.7  | 94.6  | 94.6  | 92.5  |                  |
| 5+                                                     | 100                            | 100   | 100   | 100   | 100   |                  |
| <sup>a</sup> Effects are set equal for all risk groups |                                |       |       |       |       |                  |

2
