# Supplementary material for: Estimating the cost-effectiveness of a sequential pneumococcal vaccination program for adults in Germany
Source: PubMed Central journal article supplement (PMC5967715; doi:10.1371/journal.pone.0197905), 2018-05-24
Supplement: pone.0197905.s004.pdf [file pone.0197905.s004.pdf]

1 S3 Table. Distribution of PSA parameters

| Parameters                                              | Distribution                            |                                     |         |                                    |            | Source |
|---------------------------------------------------------|-----------------------------------------|-------------------------------------|---------|------------------------------------|------------|--------|
|                                                         | Cases per 100,000 in 18-49y.            | Beta Distribution <sup>a</sup>      |         |                                    |            |        |
|                                                         |                                         | No. of Cases in Cohort ( $\alpha$ ) |         | No. of Cases in Cohort ( $\beta$ ) |            |        |
| Bacteremia                                              | 2                                       | 2,489                               | 291     | 26,997,511                         | 15,039,709 | [1]    |
| Meningitis                                              | 0.1                                     | 131                                 | 21      | 26,999,869                         | 15,039,979 |        |
| Inpatient Pneumonia                                     | 198                                     | 89,785                              | 133,440 | 25,802,042                         | 67,334,756 |        |
| Outpatient Pneumonia                                    | 280                                     | 4,536                               | 189,034 | 1,435,464                          | 67,279,162 |        |
| Effectiveness of PCV13                                  | Vaccine-Type Effectiveness <sup>b</sup> | Beta Distribution <sup>a</sup>      |         |                                    |            |        |
|                                                         |                                         | No. of Cases in Cohort ( $\alpha$ ) |         | No. of Cases in Cohort ( $\beta$ ) |            |        |
| Bacteremia/Meningitis                                   |                                         |                                     |         |                                    |            |        |
| Vaccine                                                 | 76%                                     | 7                                   | -       | 42,233                             | -          | [2]    |
| Control                                                 | -                                       | 28                                  | -       | 42,228                             | -          |        |
| Inpatient Pneumonia                                     |                                         |                                     |         |                                    |            |        |
| Vaccine                                                 | 45%                                     | 33                                  | -       | 42,207                             | -          |        |
| Control                                                 | -                                       | 60                                  | -       | 42,196                             | -          |        |
| Outpatient Pneumonia                                    |                                         |                                     |         |                                    |            |        |
| Vaccine                                                 | 45%                                     | 33                                  | -       | 42,207                             | -          |        |
| Control                                                 | -                                       | 60                                  | -       | 42,496                             | -          |        |
| Reduction in Effectiveness in High-Risk vs Low/Mod-Risk | Reduction                               | No. of Cases in Cohort ( $\alpha$ ) |         | No. of Cases in Cohort ( $\beta$ ) |            |        |
| Vaccine                                                 | 65%                                     | 9                                   | -       | 18,927                             | -          |        |
| Control                                                 | -                                       | 26                                  | -       | 18,941                             | -          |        |
| Effectiveness of PPSV23                                 | Effectiveness in 18-49y.                | Beta Distribution <sup>a</sup>      |         |                                    |            |        |

|                                                                                                                                |                                   | No. of Cases in Cohort ( $\alpha$ )                 |        | No. of Cases in Cohort ( $\beta$ )                 |         |         |
|--------------------------------------------------------------------------------------------------------------------------------|-----------------------------------|-----------------------------------------------------|--------|----------------------------------------------------|---------|---------|
| Bacteremia/Meningitis                                                                                                          |                                   |                                                     |        |                                                    |         |         |
| Low-risk                                                                                                                       |                                   |                                                     |        |                                                    |         |         |
| Vaccine                                                                                                                        | 93%                               | 7                                                   | -      | 118                                                | -       | [4-6]   |
| Control                                                                                                                        | -                                 | 100                                                 | -      | 25                                                 | -       |         |
| High-risk                                                                                                                      |                                   |                                                     |        |                                                    |         |         |
| Post-vaccination                                                                                                               | 21%                               | 15                                                  | -      | 160                                                | -       |         |
| Pre-vaccination                                                                                                                | -                                 | 19                                                  | -      | 156                                                | -       |         |
| <b>Mortality</b>                                                                                                               | <b>Deaths per 100 in 18-49y.</b>  | <b>Beta Distribution<sup>a</sup></b>                |        |                                                    |         |         |
|                                                                                                                                |                                   | <b>No. of Cases in Cohort (<math>\alpha</math>)</b> |        | <b>No. of Cases in Cohort (<math>\beta</math>)</b> |         |         |
| Bacteremia                                                                                                                     | 20                                | 49                                                  | 4,542  | 268                                                | 17,756  | [7]     |
| Meningitis                                                                                                                     | 20                                | 49                                                  | 4,542  | 268                                                | 17,756  |         |
| Inpatient Pneumonia                                                                                                            | 14                                | 710                                                 | 54,758 | 5,508                                              | 333,600 | [8]     |
| <b>Medical Costs</b>                                                                                                           | <b>Costs per Cases in 18-49y.</b> | <b>Log-Normal Distribution<sup>a</sup></b>          |        |                                                    |         |         |
|                                                                                                                                |                                   | <b>Mean</b>                                         |        | <b>Standard Error</b>                              |         |         |
| Bacteremia                                                                                                                     | €7,914                            | €27,376                                             | €7,914 | €480                                               | €593    | [9]     |
| Meningitis                                                                                                                     | €4,648                            | €27,376                                             | €4,648 | €480                                               | €102    |         |
| Inpatient Pneumonia                                                                                                            | €3,415                            | €11,638                                             | €3,415 | €124                                               | €173    |         |
| Outpatient Pneumonia                                                                                                           | €1                                | €7                                                  | €1     | €1                                                 | €0      | [10-13] |
| <sup>a</sup> Distribution of values characterizing uncertainty around point estimate for youngest age group.                   |                                   |                                                     |        |                                                    |         |         |
| <sup>b</sup> Effectiveness estimates are based on data from CAPiTA trial and correspond to the mean age of subjects, 73 years. |                                   |                                                     |        |                                                    |         |         |
