# Supplementary material for: Estimating the cost-effectiveness of a sequential pneumococcal vaccination program for adults in Germany
Source: PubMed Central journal article supplement (PMC5967715; doi:10.1371/journal.pone.0197905), 2018-05-24
Supplement: pone.0197905.s005.pdf [file pone.0197905.s005.pdf]

1 S4 Table. Expected lifetime disease-related cases, deaths, and costs in German adults #1-#4

| Scenario<br>(description)       | #1<br>(sequential for all risk groups) |              |       |                  | #2<br>(LR according to STIKO, sequential only for MR<br>and HR) |              |        |                  | #3<br>(LR and MR initial vaccination with PCV13, HR<br>sequential) |              |        |                   | #4<br>(#1 with immediate waning for PCV13) |              |        |                  |
|---------------------------------|----------------------------------------|--------------|-------|------------------|-----------------------------------------------------------------|--------------|--------|------------------|--------------------------------------------------------------------|--------------|--------|-------------------|--------------------------------------------|--------------|--------|------------------|
|                                 | Current                                | Hypothetical | Δ     | 95% CI           | Current                                                         | Hypothetical | Δ      | 95% CI           | Current                                                            | Hypothetical | Δ      | 95% CI            | Current                                    | Hypothetical | Δ      | 95% CI           |
| <b>Population-Level Results</b> |                                        |              |       |                  |                                                                 |              |        |                  |                                                                    |              |        |                   |                                            |              |        |                  |
| No. of Cases                    |                                        |              |       |                  |                                                                 |              |        |                  |                                                                    |              |        |                   |                                            |              |        |                  |
| IPD (in thousands)              | 85.008                                 | 84.870       | 0.138 | (-1.866, 1.392)  | 85.283                                                          | 85.173       | -0.110 | (-1.854, 1.432)  | 85.008                                                             | 84.936       | -0.072 | (-13.284, 12.708) | 85.425                                     | 85.336       | -0.089 | (-1.904, 1.460)  |
| NBP (in millions)               |                                        |              |       |                  |                                                                 |              |        |                  |                                                                    |              |        |                   |                                            |              |        |                  |
| Requiring Inpatient Care        | 16.546                                 | 16.501       | 0.045 | (-0.057, -0.017) | 16.547                                                          | 16.504       | -0.043 | (-0.056, -0.017) | 16.546                                                             | 16.501       | -0.044 | (-0.134, 0.047)   | 16.552                                     | 16.527       | -0.024 | (-0.038, 0.001)  |
| Requiring Outpatient Care       | 23.278                                 | 23.245       | 0.033 | (-0.062, -0.003) | 23.279                                                          | 23.249       | -0.030 | (-0.058, 0.001)  | 23.278                                                             | 23.245       | -0.033 | (-0.142, 0.079)   | 23.280                                     | 23.265       | -0.015 | (-0.039, 0.011)  |
| No. of Deaths (in millions)     | 2.857                                  | 2.850        | 0.007 | (-0.015, 0.001)  | 2.859                                                           | 2.852        | -0.007 | (-0.014, 0.001)  | 2.857                                                              | 2.851        | -0.006 | (-0.033, 0.021)   | 2.860                                      | 2.856        | -0.004 | (-0.011, 0.004)  |
| Total Costs (in billions)       |                                        |              |       |                  |                                                                 |              |        |                  |                                                                    |              |        |                   |                                            |              |        |                  |
| Medical Care                    | 30.671                                 | 30.534       | 0.137 | (-0.177, -0.090) | 30.594                                                          | 30.463       | -0.131 | (-0.171, -0.086) | 30.671                                                             | 30.554       | -0.117 | (-0.303, 0.018)   | 65.914                                     | 65.793       | -0.122 | (-0.172, -0.068) |
| Non-Medical Care                | 3.835                                  | 3.810        | 0.025 | (-0.077, 0.026)  | 3.842                                                           | 3.816        | -0.026 | (-0.077, 0.027)  | 3.835                                                              | 3.817        | -0.018 | (-0.089, 0.050)   | 3.881                                      | 3.816        | -0.065 | (-0.189, 0.025)  |

|                                               |        |        |       |                      |        |        |       |                      |        |        |       |                    |          |          |       |                      |
|-----------------------------------------------|--------|--------|-------|----------------------|--------|--------|-------|----------------------|--------|--------|-------|--------------------|----------|----------|-------|----------------------|
| Vaccination                                   | 0.505  | 1.082  | 0.577 | (0.576,<br>0.579)    | 0.505  | 0.967  | 0.462 | (0.461,<br>0.464)    | 0.505  | 0.789  | 0.284 | (0.283,<br>0.285)  | 0.505    | 1.082    | 0.577 | (0.576,<br>0.579)    |
| <b>Total</b>                                  |        |        |       |                      |        |        |       |                      |        |        |       |                    |          |          |       |                      |
| Medical +<br>Vaccination                      | 31.176 | 31.616 | 0.440 | (0.399,<br>0.487)    | 31.099 | 31.430 | 0.331 | (0.291,<br>0.376)    | 31.176 | 31.343 | 0.167 | (-0.018,<br>0.302) | 66.419   | 66.875   | 0.456 | (0.406,<br>0.510)    |
| Medical +<br>Non-<br>Medical +<br>Vaccination | 35.011 | 35.426 | 0.415 | (0.335,<br>0.494)    | 34.941 | 35.246 | 0.305 | (0.223,<br>0.387)    | 35.011 | 35.160 | 0.149 | (-0.042,<br>0.281) | 70.300   | 70.690   | 0.391 | (0.252,<br>0.508)    |
| <b>Patient-Level Results</b>                  |        |        |       |                      |        |        |       |                      |        |        |       |                    |          |          |       |                      |
| <b>Total Costs</b>                            |        |        |       |                      |        |        |       |                      |        |        |       |                    |          |          |       |                      |
| Medical Care                                  | 454.61 | 452.58 | -2.03 | (-2.630, -<br>1.336) | 453.46 | 451.52 | -1.95 | (-2.532, -<br>1.274) | 454.61 | 452.87 | -1.74 | (-4.486,<br>0.267) | 976.97   | 975.17   | -1.80 | (-7.040, -<br>2.440) |
| Non-Medical<br>Care                           | 56.85  | 56.47  | -0.38 | (-1.139,<br>0.382)   | 56.95  | 56.56  | -0.39 | (-1.142,<br>0.396)   | 56.85  | 56.57  | -0.27 | (-1.324,<br>0.746) | 57.52    | 56.56    | -0.96 | (-4.411,<br>0.482)   |
| Vaccination                                   | 7.48   | 16.04  | 8.56  | (8.541,<br>8.580)    | 7.48   | 14.33  | 6.85  | (6.833,<br>6.870)    | 7.48   | 11.69  | 4.21  | (4.197,<br>4.228)  | 7.48     | 16.04    | 8.56  | (8.540,<br>8.576)    |
| <b>Total</b>                                  |        |        |       |                      |        |        |       |                      |        |        |       |                    |          |          |       |                      |
| Medical +<br>Vaccination                      | 462.09 | 468.61 | 6.53  | (5.921,<br>7.224)    | 460.94 | 465.85 | 4.90  | (4.307,<br>5.573)    | 462.09 | 464.56 | 2.48  | (-0.270,<br>4.477) | 984.45   | 991.20   | 6.76  | (6.018,<br>7.556)    |
| Medical +<br>Non-<br>Medical +<br>Vaccination | 518.93 | 525.08 | 6.15  | (4.963,<br>7.321)    | 517.89 | 522.41 | 4.52  | (3.305,<br>5.733)    | 518.93 | 521.13 | 2.20  | (-0.622,<br>4.159) | 1,041.97 | 1,047.76 | 5.79  | (3.730,<br>7.523)    |

|                                                                                                                                                                                                                                                                                                                                                                                                                                                                                                                                               |         |         |        |                   |         |         |        |                   |         |         |        |                   |         |         |        |                   |
|-----------------------------------------------------------------------------------------------------------------------------------------------------------------------------------------------------------------------------------------------------------------------------------------------------------------------------------------------------------------------------------------------------------------------------------------------------------------------------------------------------------------------------------------------|---------|---------|--------|-------------------|---------|---------|--------|-------------------|---------|---------|--------|-------------------|---------|---------|--------|-------------------|
| Life-Years (discounted)                                                                                                                                                                                                                                                                                                                                                                                                                                                                                                                       | 18.7107 | 18.7114 | 0.0007 | (-0.0013, 0.0030) | 18.7107 | 18.7114 | 0.0007 | (-0.0013, 0.0032) | 18.7107 | 18.7113 | 0.0007 | (-0.0030, 0.0043) | 18.7105 | 18.7109 | 0.0004 | (-0.0024, 0.0026) |
| QALY (discounted)                                                                                                                                                                                                                                                                                                                                                                                                                                                                                                                             | 15.1794 | 15.1798 | 0.0004 | (-0.0009, 0.0021) | 15.1794 | 15.1799 | 0.0004 | (-0.0009, 0.0022) | 15.1794 | 15.1798 | 0.0004 | (-0.0020, 0.0029) | 15.1793 | 15.1795 | 0.0002 | (-0.0014, 0.0015) |
| <b>Healthcare System Perspective</b>                                                                                                                                                                                                                                                                                                                                                                                                                                                                                                          |         |         |        |                   |         |         |        |                   |         |         |        |                   |         |         |        |                   |
| Cost per Life-Year Gained                                                                                                                                                                                                                                                                                                                                                                                                                                                                                                                     | €8,964  |         |        |                   | €7,013  |         |        |                   | €3,662  |         |        |                   | €16,879 |         |        |                   |
| Cost per QALY Gained                                                                                                                                                                                                                                                                                                                                                                                                                                                                                                                          | €14,881 |         |        |                   | €11,584 |         |        |                   | €5,828  |         |        |                   | €29,635 |         |        |                   |
| <b>Societal Perspective</b>                                                                                                                                                                                                                                                                                                                                                                                                                                                                                                                   |         |         |        |                   |         |         |        |                   |         |         |        |                   |         |         |        |                   |
| Cost per Life-Year Gained                                                                                                                                                                                                                                                                                                                                                                                                                                                                                                                     | €8,447  |         |        |                   | €6,459  |         |        |                   | €3,258  |         |        |                   | €14,470 |         |        |                   |
| Cost per QALY Gained                                                                                                                                                                                                                                                                                                                                                                                                                                                                                                                          | €14,023 |         |        |                   | €10,667 |         |        |                   | €5,186  |         |        |                   | €25,406 |         |        |                   |
| <p>QALY: quality-adjusted life year</p> <p>Note: Low-risk is specified as immunocompetent patients without any chronic medical conditions, moderate-risk describes immunocompetent patients with at least one chronic medical condition and high-risk represent immunocompromised/immunosuppressed patients, with or without chronic medical conditions (congenital or acquired).</p> <p>Healthcare system perspective includes medical and vaccination costs; societal perspective includes medical, non-medical, and vaccination costs.</p> |         |         |        |                   |         |         |        |                   |         |         |        |                   |         |         |        |                   |
