# Supplementary material for: Estimating the cost-effectiveness of a sequential pneumococcal vaccination program for adults in Germany
Source: PubMed Central journal article supplement (PMC5967715; doi:10.1371/journal.pone.0197905), 2018-05-24
Supplement: pone.0197905.s006.pdf [file pone.0197905.s006.pdf]

1 S5 Table. Expected lifetime disease-related cases, deaths, and costs in German adults #5-#7

| Scenario<br>(description)       | #5<br>(#1 with 64% NBP Effectiveness PPSV23) |              |        |                  | #6<br>(#1 with 50% revaccination rate) |              |        |                  | #7<br>(#2 with 50% revaccination rate) |              |        |                  |
|---------------------------------|----------------------------------------------|--------------|--------|------------------|----------------------------------------|--------------|--------|------------------|----------------------------------------|--------------|--------|------------------|
|                                 | Current                                      | Hypothetical | Δ      | 95% CI           | Current                                | Hypothetical | Δ      | 95% CI           | Current                                | Hypothetical | Δ      | 95% CI           |
| <b>Population-Level Results</b> |                                              |              |        |                  |                                        |              |        |                  |                                        |              |        |                  |
| No, of Cases                    |                                              |              |        |                  |                                        |              |        |                  |                                        |              |        |                  |
| IPD (in thousands)              | 85.369                                       | 85.321       | -0.048 | (-1.505, 1.075)  | 85.423                                 | 85.298       | -0.125 | (-1.929, 1.487)  | 84.910                                 | 84.768       | -0.142 | (-1.882, 1.465)  |
| NBP (in millions)               |                                              |              |        |                  |                                        |              |        |                  |                                        |              |        |                  |
| Requiring Inpatient Care        | 16.540                                       | 16.509       | -0.031 | (-0.043, -0.018) | 16.547                                 | 16.503       | -0.044 | (-0.057, -0.016) | 16.546                                 | 16.503       | -0.043 | (-0.056, -0.013) |
| Requiring Out-patient Care      | 23.257                                       | 23.211       | -0.045 | (-0.067, -0.026) | 23.278                                 | 23.245       | -0.033 | (-0.064, -0.003) | 23.276                                 | 23.247       | -0.030 | (-0.059, -0.001) |
| No, of Deaths (in millions)     | 2.859                                        | 2.855        | -0.004 | (-0.010, 0.002)  | 2.858                                  | 2.851        | -0.008 | (-0.015, 0.000)  | 2.858                                  | 2.851        | -0.007 | (-0.014, 0.001)  |
| Total Costs (in billions)       |                                              |              |        |                  |                                        |              |        |                  |                                        |              |        |                  |
| Medical Care                    | 30.634                                       | 30.538       | -0.096 | (-0.201, 0.014)  | 30.601                                 | 30.465       | -0.136 | (-0.176, -0.085) | 30.638                                 | 30.507       | -0.132 | (-0.173, -0.078) |
| Non-Medical Care                | 3.831                                        | 3.812        | -0.019 | (-0.058, 0.018)  | 3.841                                  | 3.815        | -0.026 | (-0.076, 0.028)  | 3.842                                  | 3.815        | -0.027 | (-0.078, 0.029)  |
| Vaccination                     | 0.505                                        | 1.082        | 0.577  | (0.576, 0.578)   | 0.505                                  | 1.082        | 0.577  | (0.576, 0.579)   | 0.505                                  | 0.967        | 0.462  | (0.461, 0.463)   |

|                                           |             |         |        |                      |         |         |        |                      |         |         |        |                      |
|-------------------------------------------|-------------|---------|--------|----------------------|---------|---------|--------|----------------------|---------|---------|--------|----------------------|
| Total                                     |             |         |        |                      |         |         |        |                      |         |         |        |                      |
| Medical +<br>Vaccination                  | 31.139      | 31.620  | 0.481  | (0.376,<br>0.591)    | 31.106  | 31.547  | 0.442  | (0.401,<br>0.492)    | 31.143  | 31.473  | 0.330  | (0.290,<br>0.383)    |
| Medical +<br>Non-Medical +<br>Vaccination | 34.969      | 35.431  | 0.462  | (0.357,<br>0.571)    | 34.947  | 35.362  | 0.415  | (0.336,<br>0.494)    | 34.985  | 35.288  | 0.303  | (0.224,<br>0.385)    |
| <b>Patient-Level Results</b>              |             |         |        |                      |         |         |        |                      |         |         |        |                      |
| Total Costs                               |             |         |        |                      |         |         |        |                      |         |         |        |                      |
| Medical Care                              | 454.05      | 452.63  | -1.42  | (-7.638, -<br>0.114) | 453.56  | 451.55  | -2.01  | (-2.609, -<br>1.263) | 454.11  | 452.16  | -1.95  | (-2.557, -<br>1.160) |
| Non-Medical<br>Care                       | 56.78       | 56.49   | -0.28  | (-1.398,<br>0.337)   | 56.93   | 56.54   | -0.39  | (-1.121,<br>0.408)   | 56.95   | 56.54   | -0.40  | (-1.159,<br>0.430)   |
| Vaccination                               | 7.48        | 16.04   | 8.56   | (8.544,<br>8.568)    | 7.48    | 16.04   | 8.56   | (8.542,<br>8.576)    | 7.48    | 14.33   | 6.85   | (6.835,<br>6.866)    |
| Total                                     |             |         |        |                      |         |         |        |                      |         |         |        |                      |
| Medical +<br>Vaccination                  | 461.53      | 468.66  | 7.13   | (5.573,<br>8.763)    | 461.04  | 467.59  | 6.55   | (5.939,<br>7.291)    | 461.59  | 466.49  | 4.90   | (4.293,<br>5.680)    |
| Medical +<br>Non-Medical +<br>Vaccination | 518.31      | 525.16  | 6.85   | (5.284,<br>8.466)    | 517.98  | 524.13  | 6.16   | (4.977,<br>7.315)    | 518.54  | 523.03  | 4.49   | (3.317,<br>5.713)    |
| Life-Years (dis-<br>counted)              | 18.711<br>1 | 18.7114 | 0.0003 | (-0.0014,<br>0.0020) | 18.7106 | 18.7113 | 0.0007 | (-0.0014,<br>0.0031) | 18.7108 | 18.7114 | 0.0006 | (-0.0014,<br>0.0030) |
| QALY (discount-<br>ed)                    | 16.202<br>4 | 16.2026 | 0.0002 | (-0.0021,<br>0.0024) | 15.1794 | 15.1798 | 0.0004 | (-0.0010,<br>0.0021) | 15.1795 | 15.1798 | 0.0004 | (-0.0010,<br>0.0021) |

| <b>Healthcare System Perspective</b>                                                                                                                                                                                                                                                                                                                                                                                                                                                                                                          |         |         |         |
|-----------------------------------------------------------------------------------------------------------------------------------------------------------------------------------------------------------------------------------------------------------------------------------------------------------------------------------------------------------------------------------------------------------------------------------------------------------------------------------------------------------------------------------------------|---------|---------|---------|
| Cost per Life-Year Gained                                                                                                                                                                                                                                                                                                                                                                                                                                                                                                                     | €23,061 | €9,527  | €7,946  |
| Cost per QALY Gained                                                                                                                                                                                                                                                                                                                                                                                                                                                                                                                          | €29,617 | €5,828  | €13,699 |
| <b>Societal Perspective</b>                                                                                                                                                                                                                                                                                                                                                                                                                                                                                                                   |         |         |         |
| Cost per Life-Year Gained                                                                                                                                                                                                                                                                                                                                                                                                                                                                                                                     | €22,146 | €8,960  | €7,290  |
| Cost per QALY Gained                                                                                                                                                                                                                                                                                                                                                                                                                                                                                                                          | €28,441 | €14,898 | €12,570 |
| <p>QALY: quality-adjusted life year</p> <p>Note: Low-risk is specified as immunocompetent patients without any chronic medical conditions, moderate-risk describes immunocompetent patients with at least one chronic medical condition and high-risk represent immunocompromised/immunosuppressed patients, with or without chronic medical conditions (congenital or acquired).</p> <p>Healthcare system perspective includes medical and vaccination costs; societal perspective includes medical, non-medical, and vaccination costs.</p> |         |         |         |
