# Supplementary material for: Estimating the cost-effectiveness of a sequential pneumococcal vaccination program for adults in Germany
Source: PubMed Central journal article supplement (PMC5967715; doi:10.1371/journal.pone.0197905), 2018-05-24
Supplement: pone.0197905.s007.pdf [file pone.0197905.s007.pdf]

1 S6 Table. Expected lifetime disease-related cases, deaths, and costs in German adults <60 years (#1-#4)

| Scenario<br>(description)       | #1<br>(sequential for all risk groups) |                   |        |                      | #2<br>(LR according to STIKO, sequential only for MR<br>and HR) |                   |        |                      | #3<br>(LR and MR initial vaccination with PCV13, HR<br>sequential) |                   |        |                    | #4<br>(#1 with immediate waning for PCV13) |                   |        |                      |
|---------------------------------|----------------------------------------|-------------------|--------|----------------------|-----------------------------------------------------------------|-------------------|--------|----------------------|--------------------------------------------------------------------|-------------------|--------|--------------------|--------------------------------------------|-------------------|--------|----------------------|
|                                 | Cur-<br>rent                           | Hypothet-<br>ical | Δ      | 95% CI               | Current                                                         | Hypothet-<br>ical | Δ      | 95% CI               | Current                                                            | Hypothet-<br>ical | Δ      | 95% CI             | Current                                    | Hypothet-<br>ical | Δ      | 95% CI               |
| <b>Population-Level Results</b> |                                        |                   |        |                      |                                                                 |                   |        |                      |                                                                    |                   |        |                    |                                            |                   |        |                      |
| No. of Cases                    |                                        |                   |        |                      |                                                                 |                   |        |                      |                                                                    |                   |        |                    |                                            |                   |        |                      |
| IPD (in thou-<br>sands)         | 60.462                                 | 60.370            | -0.093 | (-1.153,<br>1.069)   | 60.667                                                          | 60.578            | -0.089 | (-1.183,<br>1.054)   | 60.462                                                             | 60.523            | 0.060  | (-9.160,<br>8.868) | 60.736                                     | 60.648            | -0.088 | (-1.316,<br>1.257)   |
| NBP (in millions)               |                                        |                   |        |                      |                                                                 |                   |        |                      |                                                                    |                   |        |                    |                                            |                   |        |                      |
| Requiring In-<br>patient Care   | 10.069                                 | 10.063            | -0.006 | (-0.015,<br>0.005)   | 10.069                                                          | 10.064            | -0.006 | (-0.016,<br>0.005)   | 10.069                                                             | 10.063            | -0.005 | (-0.066,<br>0.051) | 10.068                                     | 10.064            | -0.005 | (-0.015,<br>0.006)   |
| Requiring Out-<br>patient Care  | 14.174                                 | 14.163            | -0.011 | (-0.024,<br>0.004)   | 14.175                                                          | 14.164            | -0.011 | (-0.025,<br>0.006)   | 14.174                                                             | 14.164            | -0.011 | (-0.076,<br>0.055) | 14.175                                     | 14.169            | -0.005 | (-0.019,<br>0.010)   |
| No. of Deaths (in<br>millions)  | 1.541                                  | 1.540             | 0.000  | (-0.003,<br>0.003)   | 1.541                                                           | 1.541             | -0.001 | (-0.003,<br>0.002)   | 1.541                                                              | 1.541             | 0.000  | (-0.015,<br>0.015) | 1.541                                      | 1.540             | -0.001 | (-0.003,<br>0.003)   |
| Total Costs (in billions)       |                                        |                   |        |                      |                                                                 |                   |        |                      |                                                                    |                   |        |                    |                                            |                   |        |                      |
| Medical Care                    | 14.287                                 | 14.267            | -0.020 | (-0.036, -<br>0.004) | 14.251                                                          | 14.231            | -0.020 | (-0.036, -<br>0.003) | 14.287                                                             | 14.276            | -0.011 | (-2.013,<br>1.816) | 30.735                                     | 30.704            | -0.030 | (-0.049, -<br>0.012) |
| Non-Medical<br>Care             | 3.156                                  | 3.136             | -0.020 | (-0.069,<br>0.030)   | 3.163                                                           | 3.142             | -0.021 | (-0.070,<br>0.030)   | 3.156                                                              | 3.143             | -0.013 | (-0.076,<br>0.054) | 3.200                                      | 3.139             | -0.061 | (-0.185,<br>0.026)   |
| Vaccination                     | 0.193                                  | 0.441             | 0.247  | (0.247,<br>0.247)    | 0.193                                                           | 0.441             | 0.247  | (0.247,<br>0.247)    | 0.193                                                              | 0.315             | 0.122  | (0.121,<br>0.122)  | 0.193                                      | 0.441             | 0.247  | (0.247,<br>0.247)    |

|                                           |             |         |        |                      |         |         |        |                      |         |         |        |                      |         |         |        |                      |
|-------------------------------------------|-------------|---------|--------|----------------------|---------|---------|--------|----------------------|---------|---------|--------|----------------------|---------|---------|--------|----------------------|
|                                           |             |         |        | 0.248)               |         |         |        | 0.248)               |         |         |        | 0.122)               |         |         |        | 0.248)               |
| <b>Total</b>                              |             |         |        |                      |         |         |        |                      |         |         |        |                      |         |         |        |                      |
| Medical +<br>Vaccination                  | 14.480      | 14.708  | 0.228  | (0.212,<br>0.244)    | 14.444  | 14.672  | 0.228  | (0.211,<br>0.245)    | 14.480  | 14.591  | 0.111  | (-1.891,<br>1.938)   | 30.928  | 31.145  | 0.217  | (0.198,<br>0.235)    |
| Medical +<br>Non-Medical +<br>Vaccination | 17.636      | 17.844  | 0.208  | (0.154,<br>0.263)    | 17.607  | 17.814  | 0.207  | (0.152,<br>0.263)    | 17.636  | 17.734  | 0.098  | (-1.906,<br>1.935)   | 34.128  | 34.284  | 0.156  | (0.025,<br>0.247)    |
| <b>Patient-Level Results</b>              |             |         |        |                      |         |         |        |                      |         |         |        |                      |         |         |        |                      |
| <b>Total Costs</b>                        |             |         |        |                      |         |         |        |                      |         |         |        |                      |         |         |        |                      |
| Medical Care                              | 311.89      | 311.46  | -0.43  | (-0.79, -<br>0.08)   | 311.10  | 310.67  | -0.43  | (-0.79, -<br>0.07)   | 311.89  | 311.65  | -0.24  | (-43.94,<br>39.65)   | 670.96  | 670.29  | -0.67  | (-1.08, -<br>0.27)   |
| Non-Medical<br>Care                       | 68.90       | 68.46   | -0.44  | (-1.52,<br>0.66)     | 69.05   | 68.59   | -0.46  | (-1.53, 0.66)        | 68.90   | 68.62   | -0.28  | (-1.66, 1.17)        | 69.85   | 68.53   | -1.33  | (-4.04,<br>0.57)     |
| Vaccination                               | 4.22        | 9.62    | 5.40   | (5.39,<br>5.42)      | 4.22    | 9.62    | 5.40   | (5.39, 5.42)         | 4.22    | 6.88    | 2.66   | (2.65, 2.67)         | 4.22    | 9.62    | 5.40   | (5.38,<br>5.42)      |
| <b>Total</b>                              |             |         |        |                      |         |         |        |                      |         |         |        |                      |         |         |        |                      |
| Medical +<br>Vaccination                  | 316.10      | 321.08  | 4.97   | (4.62,<br>5.33)      | 315.32  | 320.29  | 4.97   | (4.62, 5.34)         | 316.10  | 318.52  | 2.42   | (-41.27,<br>42.31)   | 675.17  | 679.91  | 4.74   | (4.32,<br>5.12)      |
| Medical +<br>Non-Medical +<br>Vaccination | 385.01      | 389.54  | 4.53   | (3.37,<br>5.75)      | 384.37  | 388.88  | 4.51   | (3.32, 5.73)         | 385.01  | 387.14  | 2.13   | (-41.61,<br>42.24)   | 745.03  | 748.44  | 3.41   | (0.54,<br>5.39)      |
| Life-Years (dis-<br>counted)              | 22.680<br>1 | 22.6802 | 0.0001 | (-0.0020,<br>0.0022) | 22.6801 | 22.6803 | 0.0002 | (-0.0021,<br>0.0025) | 22.6801 | 22.6802 | 0.0001 | (-0.0039,<br>0.0041) | 22.6800 | 22.6800 | 0.0000 | (-0.0020,<br>0.0020) |
| QALY (discount-                           | 19.044      | 19.0441 | 0.0001 | (-0.0013,<br>0.0013) | 19.0440 | 19.0442 | 0.0001 | (-0.0013,<br>0.0013) | 19.0440 | 19.0441 | 0.0001 | (-0.0025,<br>0.0025) | 19.0440 | 19.0440 | 0.0000 | (-0.0012,<br>0.0012) |

|                                                                                                                                                                                                                                                                                                                                                                                                                                                                                                                                               |         |  |         |  |  |         |  |  |            |  |  |         |
|-----------------------------------------------------------------------------------------------------------------------------------------------------------------------------------------------------------------------------------------------------------------------------------------------------------------------------------------------------------------------------------------------------------------------------------------------------------------------------------------------------------------------------------------------|---------|--|---------|--|--|---------|--|--|------------|--|--|---------|
| ed)                                                                                                                                                                                                                                                                                                                                                                                                                                                                                                                                           | 0       |  | 0.0015) |  |  | 0.0017) |  |  | 0.0028)    |  |  | 0.0014) |
| <b>Healthcare System Perspective</b>                                                                                                                                                                                                                                                                                                                                                                                                                                                                                                          |         |  |         |  |  |         |  |  |            |  |  |         |
| Cost per Life-Year Gained                                                                                                                                                                                                                                                                                                                                                                                                                                                                                                                     | €34,154 |  | €26,510 |  |  | €31,506 |  |  | €128,026   |  |  |         |
| Cost per QALY Gained                                                                                                                                                                                                                                                                                                                                                                                                                                                                                                                          | €50,497 |  | €37,328 |  |  | €30,578 |  |  | €4,478,002 |  |  |         |
| <b>Societal Perspective</b>                                                                                                                                                                                                                                                                                                                                                                                                                                                                                                                   |         |  |         |  |  |         |  |  |            |  |  |         |
| Cost per Life-Year Gained                                                                                                                                                                                                                                                                                                                                                                                                                                                                                                                     | €31,139 |  | €24,040 |  |  | €27,811 |  |  | €92,195    |  |  |         |
| Cost per QALY Gained                                                                                                                                                                                                                                                                                                                                                                                                                                                                                                                          | €46,039 |  | €33,850 |  |  | €26,992 |  |  | €3,224,738 |  |  |         |
| <p>QALY: quality-adjusted life year</p> <p>Note: Low-risk is specified as immunocompetent patients without any chronic medical conditions, moderate-risk describes immunocompetent patients with at least one chronic medical condition and high-risk represent immunocompromised/immunosuppressed patients, with or without chronic medical conditions (congenital or acquired).</p> <p>Healthcare system perspective includes medical and vaccination costs; societal perspective includes medical, non-medical, and vaccination costs.</p> |         |  |         |  |  |         |  |  |            |  |  |         |
