# Supplementary material for: Estimating the cost-effectiveness of a sequential pneumococcal vaccination program for adults in Germany
Source: PubMed Central journal article supplement (PMC5967715; doi:10.1371/journal.pone.0197905), 2018-05-24
Supplement: pone.0197905.s008.pdf [file pone.0197905.s008.pdf]

1 S7 Table. Expected lifetime disease-related cases, deaths, and costs in German adults <60 years (#5-#8)

| Scenario<br>(description)   | #5<br>(#1 with 64% NBP Effectiveness PPSV23) |              |        |                 | #6<br>(#1 with 50% revaccination rate) |              |        |                 | #7<br>(#2 with 50% revaccination rate) |              |        |                 |
|-----------------------------|----------------------------------------------|--------------|--------|-----------------|----------------------------------------|--------------|--------|-----------------|----------------------------------------|--------------|--------|-----------------|
|                             | Current                                      | Hypothetical | Δ      | 95% CI          | Current                                | Hypothetical | Δ      | 95% CI          | Current                                | Hypothetical | Δ      | 95% CI          |
| No. of Cases                |                                              |              |        |                 |                                        |              |        |                 |                                        |              |        |                 |
| IPD (in thousands)          | 60.870                                       | 60.814       | -0.056 | (-0.837, 0.848) | 60.777                                 | 60.674       | -0.102 | (-1.213, 1.090) | 60.400                                 | 60.300       | -0.100 | (-1.150, 1.140) |
| NBP (in millions)           |                                              |              |        |                 |                                        |              |        |                 |                                        |              |        |                 |
| Requiring In-patient Care   | 10.068                                       | 10.063       | -0.005 | (-0.013, 0.003) | 10.070                                 | 10.064       | -0.005 | (-0.015, 0.007) | 10.068                                 | 10.063       | -0.006 | (-0.015, 0.006) |
| Requiring Outpatient Care   | 14.174                                       | 14.167       | -0.007 | (-0.017, 0.003) | 14.174                                 | 14.164       | -0.010 | (-0.025, 0.005) | 14.173                                 | 14.163       | -0.011 | (-0.025, 0.004) |
| No. of Deaths (in millions) | 1.542                                        | 1.541        | -0.001 | (-0.003, 0.001) | 1.541                                  | 1.540        | -0.001 | (-0.004, 0.002) | 1.541                                  | 1.540        | -0.001 | (-0.004, 0.002) |
| Total Costs (in billions)   |                                              |              |        |                 |                                        |              |        |                 |                                        |              |        |                 |
| Medical Care                | 14.278                                       | 14.260       | -0.018 | (-0.091, 0.060) | 14.255                                 | 14.235       | -0.019 | (-0.035, 0.002) | 14.271                                 | 14.251       | -0.020 | (-0.036, 0.003) |
| Non-Medical Care            | 3.154                                        | 3.139        | -0.016 | (-0.052, 0.021) | 3.162                                  | 3.141        | -0.021 | (-0.068, 0.032) | 3.163                                  | 3.141        | -0.022 | (-0.071, 0.033) |
| Vaccination                 | 0.193                                        | 0.441        | 0.247  | (0.247, 0.248)  | 0.193                                  | 0.441        | 0.247  | (0.247, 0.248)  | 0.193                                  | 0.441        | 0.247  | (0.247, 0.248)  |
| Total                       |                                              |              |        |                 |                                        |              |        |                 |                                        |              |        |                 |

|                                           |             |         |        |                      |         |         |        |                      |         |         |        |                      |
|-------------------------------------------|-------------|---------|--------|----------------------|---------|---------|--------|----------------------|---------|---------|--------|----------------------|
| Medical +<br>Vaccination                  | 14.472      | 14.701  | 0.229  | (0.156,<br>0.308)    | 14.448  | 14.676  | 0.228  | (0.212,<br>0.245)    | 14.464  | 14.691  | 0.228  | (0.211,<br>0.245)    |
| Medical +<br>Non-Medical +<br>Vaccination | 17.626      | 17.840  | 0.214  | (0.141,<br>0.291)    | 17.610  | 17.817  | 0.207  | (0.156,<br>0.263)    | 17.627  | 17.832  | 0.205  | (0.153,<br>0.266)    |
| <b>Patient-Level Results</b>              |             |         |        |                      |         |         |        |                      |         |         |        |                      |
| Total Costs                               |             |         |        |                      |         |         |        |                      |         |         |        |                      |
| Medical Care                              | 311.71      | 311.31  | -0.40  | (-1.99,<br>1.32)     | 311.19  | 310.77  | -0.42  | (-0.77, -<br>0.05)   | 311.53  | 311.10  | -0.43  | (-0.79, -<br>0.06)   |
| Non-Medical<br>Care                       | 68.86       | 68.52   | -0.34  | (-1.13,<br>0.45)     | 69.03   | 68.57   | -0.46  | (-1.48, 0.69)        | 69.05   | 68.57   | -0.48  | (-1.54, 0.72)        |
| Vaccination                               | 4.22        | 9.62    | 5.40   | (5.39,<br>5.41)      | 4.22    | 9.62    | 5.40   | (5.39, 5.42)         | 4.22    | 9.62    | 5.40   | (5.39, 5.42)         |
| Total                                     |             |         |        |                      |         |         |        |                      |         |         |        |                      |
| Medical +<br>Vaccination                  | 315.92      | 320.93  | 5.01   | (3.41,<br>6.72)      | 315.40  | 320.38  | 4.98   | (4.64, 5.35)         | 315.75  | 320.72  | 4.97   | (4.61, 5.35)         |
| Medical +<br>Non-Medical +<br>Vaccination | 384.78      | 389.45  | 4.66   | (3.08,<br>6.36)      | 384.43  | 388.96  | 4.53   | (3.41, 5.74)         | 384.80  | 389.29  | 4.49   | (3.34, 5.81)         |
| Life-Years (dis-<br>counted)              | 22.680<br>2 | 22.6803 | 0.0001 | (-0.0013,<br>0.0016) | 22.6800 | 22.6802 | 0.0001 | (-0.0020,<br>0.0023) | 22.6801 | 22.6802 | 0.0001 | (-0.0021,<br>0.0023) |
| QALY (discount-<br>ed)                    | 19.757<br>3 | 19.7574 | 0.0001 | (-0.0010,<br>0.0014) | 19.0440 | 19.0441 | 0.0001 | (-0.0012,<br>0.0016) | 19.0441 | 19.0441 | 0.0001 | (-0.0013,<br>0.0017) |
| <b>Healthcare System Perspective</b>      |             |         |        |                      |         |         |        |                      |         |         |        |                      |

|                                                                                                                                                                                                                                                                                                                                                                                                                                                                                                                                               |         |         |         |
|-----------------------------------------------------------------------------------------------------------------------------------------------------------------------------------------------------------------------------------------------------------------------------------------------------------------------------------------------------------------------------------------------------------------------------------------------------------------------------------------------------------------------------------------------|---------|---------|---------|
| Cost per Life-Year Gained                                                                                                                                                                                                                                                                                                                                                                                                                                                                                                                     | €43,230 | €33,262 | €35,527 |
| Cost per QALY Gained                                                                                                                                                                                                                                                                                                                                                                                                                                                                                                                          | €55,366 | €50,526 | €54,658 |
| <b>Societal Perspective</b>                                                                                                                                                                                                                                                                                                                                                                                                                                                                                                                   |         |         |         |
| Cost per Life-Year Gained                                                                                                                                                                                                                                                                                                                                                                                                                                                                                                                     | €40,268 | €30,207 | €32,062 |
| Cost per QALY Gained                                                                                                                                                                                                                                                                                                                                                                                                                                                                                                                          | €51,572 | €45,884 | €49,328 |
| <p>QALY: quality-adjusted life year</p> <p>Note: Low-risk is specified as immunocompetent patients without any chronic medical conditions, moderate-risk describes immunocompetent patients with at least one chronic medical condition and high-risk represent immunocompromised/immunosuppressed patients, with or without chronic medical conditions (congenital or acquired).</p> <p>Healthcare system perspective includes medical and vaccination costs; societal perspective includes medical, non-medical, and vaccination costs.</p> |         |         |         |

2
