# Supplementary material for: Estimating the cost-effectiveness of a sequential pneumococcal vaccination program for adults in Germany
Source: PubMed Central journal article supplement (PMC5967715; doi:10.1371/journal.pone.0197905), 2018-05-24
Supplement: pone.0197905.s009.pdf [file pone.0197905.s009.pdf]

1 S8 Table. Expected lifetime disease-related cases, deaths, and costs in German adults ≥60 years (#1-#4)

| Scenario<br>(description)       | #1<br>(sequential for all risk groups) |                   |        |                     | #2<br>(LR according to STIKO, sequential only for MR<br>and HR) |                   |        |                      | #3<br>(LR and MR initial vaccination with PCV13, HR<br>sequential) |                   |        |                      | #4<br>(#1 with immediate waning for PCV13) |                   |        |                      |
|---------------------------------|----------------------------------------|-------------------|--------|---------------------|-----------------------------------------------------------------|-------------------|--------|----------------------|--------------------------------------------------------------------|-------------------|--------|----------------------|--------------------------------------------|-------------------|--------|----------------------|
|                                 | Cur-<br>rent                           | Hypothet-<br>ical | Δ      | 95% CI              | Current                                                         | Hypothet-<br>ical | Δ      | 95% CI               | Current                                                            | Hypothet-<br>ical | Δ      | 95% CI               | Current                                    | Hypothet-<br>ical | Δ      | 95% CI               |
| <b>Population-Level Results</b> |                                        |                   |        |                     |                                                                 |                   |        |                      |                                                                    |                   |        |                      |                                            |                   |        |                      |
| No. of Cases                    |                                        |                   |        |                     |                                                                 |                   |        |                      |                                                                    |                   |        |                      |                                            |                   |        |                      |
| IPD (in thou-<br>sands)         | 24.546                                 | 24.500            | -0.045 | (-1.132,<br>1.142)  | 24.616                                                          | 24.594            | -0.022 | (-1.087,<br>1.111)   | 24.546                                                             | 24.413            | -0.133 | (-4.098,<br>3.816)   | 24.689                                     | 24.688            | 0.000  | (-1.062,<br>1.082)   |
| NBP (in millions)               |                                        |                   |        |                     |                                                                 |                   |        |                      |                                                                    |                   |        |                      |                                            |                   |        |                      |
| Requiring In-<br>patient Care   | 6.477                                  | 6.438             | -0.039 | (-0.051,<br>-0.020) | 6.478                                                           | 6.440             | -0.037 | (-0.050, -<br>0.020) | 6.477                                                              | 6.438             | -0.039 | (-0.075, -<br>0.004) | 6.483                                      | 6.464             | -0.020 | (-0.032, -<br>0.003) |
| Requiring Out-<br>patient Care  | 9.104                                  | 9.082             | -0.022 | (-0.046,<br>-0.005) | 9.104                                                           | 9.085             | -0.019 | (-0.041, -<br>0.001) | 9.104                                                              | 9.081             | -0.023 | (-0.069,<br>0.020)   | 9.106                                      | 9.096             | -0.010 | (-0.027,<br>0.006)   |
| No. of Deaths (in<br>millions)  | 1.317                                  | 1.310             | -0.007 | (-0.014,<br>0.000)  | 1.317                                                           | 1.311             | -0.006 | (-0.013,<br>0.000)   | 1.317                                                              | 1.310             | -0.006 | (-0.019,<br>0.007)   | 1.319                                      | 1.316             | -0.003 | (-0.010,<br>0.003)   |
| Total Costs (in billions)       |                                        |                   |        |                     |                                                                 |                   |        |                      |                                                                    |                   |        |                      |                                            |                   |        |                      |
| Medical Care                    | 16.385                                 | 16.267            | -0.117 | (-0.154,<br>-0.075) | 16.344                                                          | 16.232            | -0.112 | (-0.148, -<br>0.072) | 16.385                                                             | 16.279            | -0.106 | (-2.418,<br>1.988)   | 35.180                                     | 35.088            | -0.091 | (-0.139, -<br>0.040) |
| Non-Medical<br>Care             | 0.679                                  | 0.674             | -0.005 | (-0.009,<br>-0.001) | 0.679                                                           | 0.674             | -0.005 | (-0.009, -<br>0.001) | 0.679                                                              | 0.674             | -0.005 | (-0.013,<br>0.003)   | 0.681                                      | 0.677             | -0.004 | (-0.019,<br>0.006)   |
| Vaccination                     | 0.312                                  | 0.641             | 0.330  | (0.329,<br>0.330)   | 0.312                                                           | 0.526             | 0.215  | (0.214,<br>0.215)    | 0.312                                                              | 0.474             | 0.162  | (0.162,<br>0.162)    | 0.312                                      | 0.641             | 0.330  | (0.329,<br>0.330)    |

|                                           |             |         |        |                      |         |         |        |                      |         |         |        |                      |          |          |        |                      |
|-------------------------------------------|-------------|---------|--------|----------------------|---------|---------|--------|----------------------|---------|---------|--------|----------------------|----------|----------|--------|----------------------|
|                                           |             |         |        | 0.331)               |         |         |        | 0.216)               |         |         |        | 0.163)               |          |          |        | 0.331)               |
| <b>Total</b>                              |             |         |        |                      |         |         |        |                      |         |         |        |                      |          |          |        |                      |
| Medical +<br>Vaccination                  | 16.696      | 16.909  | 0.213  | (0.175,<br>0.255)    | 16.655  | 16.758  | 0.103  | (0.067,<br>0.143)    | 16.696  | 16.753  | 0.056  | (-2.256,<br>2.150)   | 35.491   | 35.730   | 0.239  | (0.191,<br>0.290)    |
| Medical +<br>Non-Medical +<br>Vaccination | 17.375      | 17.583  | 0.207  | (0.170,<br>0.251)    | 17.334  | 17.432  | 0.098  | (0.061,<br>0.139)    | 17.375  | 17.426  | 0.051  | (-2.269,<br>2.148)   | 36.172   | 36.406   | 0.234  | (0.187,<br>0.287)    |
| <b>Patient-Level Results</b>              |             |         |        |                      |         |         |        |                      |         |         |        |                      |          |          |        |                      |
| <b>Total Costs</b>                        |             |         |        |                      |         |         |        |                      |         |         |        |                      |          |          |        |                      |
| Medical Care                              | 756.42      | 751.00  | -5.42  | (-7.11, -<br>3.45)   | 754.52  | 749.37  | -5.15  | (-6.82, -<br>3.30)   | 756.42  | 751.52  | -4.90  | (-111.63,<br>91.76)  | 1,624.10 | 1,619.89 | -4.21  | (-6.41, -<br>1.85)   |
| Non-Medical<br>Care                       | 31.35       | 31.10   | -0.24  | (-0.42, -<br>0.05)   | 31.35   | 31.12   | -0.23  | (-0.43, -<br>0.04)   | 31.35   | 31.10   | -0.25  | (-0.62, 0.12)        | 31.43    | 31.24    | -0.20  | (-0.86,<br>0.27)     |
| Vaccination                               | 14.38       | 29.61   | 15.23  | (15.18,<br>15.28)    | 14.38   | 24.29   | 9.91   | (9.87, 9.96)         | 14.38   | 21.88   | 7.50   | (7.46, 7.54)         | 14.38    | 29.61    | 15.23  | (15.18,<br>15.27)    |
| <b>Total</b>                              |             |         |        |                      |         |         |        |                      |         |         |        |                      |          |          |        |                      |
| Medical +<br>Vaccination                  | 770.80      | 780.61  | 9.81   | (8.10,<br>11.77)     | 768.90  | 773.66  | 4.76   | (3.10, 6.62)         | 770.80  | 773.40  | 2.60   | (-104.13,<br>99.27)  | 1,638.48 | 1,649.51 | 11.02  | (8.82,<br>13.37)     |
| Medical +<br>Non-Medical +<br>Vaccination | 802.15      | 811.72  | 9.57   | (7.83,<br>11.61)     | 800.26  | 804.78  | 4.53   | (2.82, 6.40)         | 802.15  | 804.50  | 2.35   | (-104.74,<br>99.18)  | 1,669.92 | 1,680.74 | 10.82  | (8.61,<br>13.25)     |
| Life-Years (dis-<br>counted)              | 10.316<br>4 | 10.3183 | 0.0020 | (-0.0047,<br>0.0078) | 10.3166 | 10.3183 | 0.0018 | (-0.0045,<br>0.0077) | 10.3164 | 10.3183 | 0.0019 | (-0.0044,<br>0.0085) | 10.3159  | 10.3171  | 0.0012 | (-0.0044,<br>0.0066) |
| QALY (discount-                           | 7.0067      | 7.0079  | 0.0012 | (-0.0032,<br>0.0068) | 7.0068  | 7.0079  | 0.0010 | (-0.0031,<br>0.0067) | 7.0067  | 7.0078  | 0.0012 | (-0.0028,<br>0.0065) | 7.0065   | 7.0072   | 0.0007 | (-0.0031,<br>0.0066) |

|                                                                                                                                                                                                                                                                                                                                                                                                                                                                                                                                               |        |        |         |         |  |         |  |  |         |  |  |         |
|-----------------------------------------------------------------------------------------------------------------------------------------------------------------------------------------------------------------------------------------------------------------------------------------------------------------------------------------------------------------------------------------------------------------------------------------------------------------------------------------------------------------------------------------------|--------|--------|---------|---------|--|---------|--|--|---------|--|--|---------|
| ed)                                                                                                                                                                                                                                                                                                                                                                                                                                                                                                                                           |        |        | 0.0045) |         |  | 0.0044) |  |  | 0.0052) |  |  | 0.0038) |
| <b>Healthcare System Perspective</b>                                                                                                                                                                                                                                                                                                                                                                                                                                                                                                          |        |        |         |         |  |         |  |  |         |  |  |         |
| Cost per Life-Year Gained                                                                                                                                                                                                                                                                                                                                                                                                                                                                                                                     | €5,006 | €2,670 | €1,336  | €9,434  |  |         |  |  |         |  |  |         |
| Cost per QALY Gained                                                                                                                                                                                                                                                                                                                                                                                                                                                                                                                          | €8,474 | €4,587 | €2,247  | €15,573 |  |         |  |  |         |  |  |         |
| <b>Societal Perspective</b>                                                                                                                                                                                                                                                                                                                                                                                                                                                                                                                   |        |        |         |         |  |         |  |  |         |  |  |         |
| Cost per Life-Year Gained                                                                                                                                                                                                                                                                                                                                                                                                                                                                                                                     | €4,881 | €2,542 | €1,207  | €9,264  |  |         |  |  |         |  |  |         |
| Cost per QALY Gained                                                                                                                                                                                                                                                                                                                                                                                                                                                                                                                          | €8,263 | €4,367 | €2,030  | €15,292 |  |         |  |  |         |  |  |         |
| <p>QALY: quality-adjusted life year</p> <p>Note: Low-risk is specified as immunocompetent patients without any chronic medical conditions, moderate-risk describes immunocompetent patients with at least one chronic medical condition and high-risk represent immunocompromised/immunosuppressed patients, with or without chronic medical conditions (congenital or acquired).</p> <p>Healthcare system perspective includes medical and vaccination costs; societal perspective includes medical, non-medical, and vaccination costs.</p> |        |        |         |         |  |         |  |  |         |  |  |         |
