# Supplementary material for: Estimating the cost-effectiveness of a sequential pneumococcal vaccination program for adults in Germany
Source: PubMed Central journal article supplement (PMC5967715; doi:10.1371/journal.pone.0197905), 2018-05-24
Supplement: pone.0197905.s010.pdf [file pone.0197905.s010.pdf]

1 **S9 Table. Expected lifetime disease-related cases, deaths, and costs in German adults ≥60 years (#5-#7)**

| Scenario<br>(description)       | #5<br>(#1 with 64% NBP Effectiveness PPSV23) |              |        |                  | #6<br>(#1 with 50% revaccination rate) |              |        |                  | #7<br>(#2 with 50% revaccination rate) |              |        |                  |
|---------------------------------|----------------------------------------------|--------------|--------|------------------|----------------------------------------|--------------|--------|------------------|----------------------------------------|--------------|--------|------------------|
|                                 | Current                                      | Hypothetical | Δ      | 95% CI           | Current                                | Hypothetical | Δ      | 95% CI           | Current                                | Hypothetical | Δ      | 95% CI           |
| <b>Population-Level Results</b> |                                              |              |        |                  |                                        |              |        |                  |                                        |              |        |                  |
| No. of Cases                    |                                              |              |        |                  |                                        |              |        |                  |                                        |              |        |                  |
| IPD (in thousands)              | 24.502                                       | 24.495       | -0.008 | (-0.819, 0.792)  | 24.646                                 | 24.624       | -0.023 | (-1.064, 1.161)  | 24.510                                 | 24.468       | -0.042 | (-1.157, 1.075)  |
| NBP (in millions)               |                                              |              |        |                  |                                        |              |        |                  |                                        |              |        |                  |
| Requiring Inpatient Care        | 6.471                                        | 6.446        | -0.026 | (-0.035, -0.013) | 6.478                                  | 6.439        | -0.039 | (-0.051, -0.020) | 6.477                                  | 6.440        | -0.037 | (-0.050, -0.019) |
| Requiring Outpatient Care       | 9.082                                        | 9.044        | -0.038 | (-0.053, -0.024) | 9.103                                  | 9.081        | -0.022 | (-0.045, -0.005) | 9.103                                  | 9.084        | -0.019 | (-0.040, -0.002) |
| No. of Deaths (in millions)     | 1.318                                        | 1.314        | -0.004 | (-0.009, 0.001)  | 1.317                                  | 1.310        | -0.007 | (-0.013, 0.000)  | 1.317                                  | 1.310        | -0.007 | (-0.013, 0.000)  |
| Total Costs (in billions)       |                                              |              |        |                  |                                        |              |        |                  |                                        |              |        |                  |
| Medical Care                    | 16.357                                       | 16.279       | -0.079 | (-0.150, -0.006) | 16.347                                 | 16.230       | -0.116 | (-0.155, -0.071) | 16.368                                 | 16.256       | -0.112 | (-0.148, -0.065) |
| Non-Medical Care                | 0.676                                        | 0.673        | -0.003 | (-0.006, 0.000)  | 0.679                                  | 0.674        | -0.005 | (-0.010, -0.001) | 0.679                                  | 0.674        | -0.005 | (-0.009, -0.001) |
| Vaccination                     | 0.311                                        | 0.641        | 0.330  | (0.329, 0.331)   | 0.312                                  | 0.641        | 0.330  | (0.329, 0.331)   | 0.312                                  | 0.526        | 0.215  | (0.214, 0.216)   |

|                                           |             |         |        |                      |         |         |        |                      |         |         |        |                      |
|-------------------------------------------|-------------|---------|--------|----------------------|---------|---------|--------|----------------------|---------|---------|--------|----------------------|
| Total                                     |             |         |        |                      |         |         |        |                      |         |         |        |                      |
| Medical +<br>Vaccination                  | 16.669      | 16.920  | 0.251  | (0.180,<br>0.324)    | 16.658  | 16.872  | 0.213  | (0.176,<br>0.258)    | 16.679  | 16.782  | 0.103  | (0.067,<br>0.149)    |
| Medical +<br>Non-Medical +<br>Vaccination | 17.345      | 17.593  | 0.248  | (0.176,<br>0.320)    | 17.337  | 17.545  | 0.208  | (0.171,<br>0.255)    | 17.358  | 17.456  | 0.098  | (0.062,<br>0.146)    |
| <b>Patient-Level Results</b>              |             |         |        |                      |         |         |        |                      |         |         |        |                      |
| Total Costs                               |             |         |        |                      |         |         |        |                      |         |         |        |                      |
| Medical Care                              | 755.14      | 751.51  | -3.63  | (-6.93, -<br>0.28)   | 754.66  | 749.28  | -5.37  | (-7.14, -<br>3.27)   | 755.64  | 750.47  | -5.17  | (-6.81, -<br>3.02)   |
| Non-Medical<br>Care                       | 31.23       | 31.07   | -0.16  | (-0.28, -<br>0.02)   | 31.34   | 31.10   | -0.25  | (-0.44, -<br>0.05)   | 31.34   | 31.11   | -0.23  | (-0.42, -<br>0.04)   |
| Vaccination                               | 14.38       | 29.61   | 15.23  | (15.20,<br>15.26)    | 14.38   | 29.61   | 15.23  | (15.19,<br>15.27)    | 14.38   | 24.29   | 9.91   | (9.87, 9.96)         |
| Total                                     |             |         |        |                      |         |         |        |                      |         |         |        |                      |
| Medical +<br>Vaccination                  | 769.52      | 781.12  | 11.60  | (8.30,<br>14.95)     | 769.04  | 778.89  | 9.86   | (8.11,<br>11.93)     | 770.02  | 774.76  | 4.74   | (3.10, 6.86)         |
| Medical +<br>Non-Medical +<br>Vaccination | 800.75      | 812.19  | 11.44  | (8.14,<br>14.78)     | 800.38  | 809.99  | 9.61   | (7.88,<br>11.77)     | 801.36  | 805.87  | 4.51   | (2.87, 6.75)         |
| Life-Years (dis-<br>counted)              | 10.317<br>5 | 10.3182 | 0.0007 | (-0.0040,<br>0.0046) | 10.3164 | 10.3182 | 0.0018 | (-0.0046,<br>0.0076) | 10.3166 | 10.3182 | 0.0016 | (-0.0045,<br>0.0071) |
| QALY (discount-<br>ed)                    | 8.6846      | 8.6852  | 0.0006 | (-0.0032,<br>0.0036) | 7.0067  | 7.0078  | 0.0011 | (-0.0032,<br>0.0046) | 7.0068  | 7.0078  | 0.0009 | (-0.0031,<br>0.0042) |

| <b>Healthcare System Perspective</b>                                                                                                                                                                                                                                                                                                                                                                                                                                                                                                          |         |        |        |
|-----------------------------------------------------------------------------------------------------------------------------------------------------------------------------------------------------------------------------------------------------------------------------------------------------------------------------------------------------------------------------------------------------------------------------------------------------------------------------------------------------------------------------------------------|---------|--------|--------|
| Cost per Life-Year Gained                                                                                                                                                                                                                                                                                                                                                                                                                                                                                                                     | €16,345 | €5,404 | €2,921 |
| Cost per QALY Gained                                                                                                                                                                                                                                                                                                                                                                                                                                                                                                                          | €20,720 | €9,135 | €5,149 |
| <b>Societal Perspective</b>                                                                                                                                                                                                                                                                                                                                                                                                                                                                                                                   |         |        |        |
| Cost per Life-Year Gained                                                                                                                                                                                                                                                                                                                                                                                                                                                                                                                     | €16,121 | €5,270 | €2,777 |
| Cost per QALY Gained                                                                                                                                                                                                                                                                                                                                                                                                                                                                                                                          | €20,437 | €8,908 | €4,896 |
| <p>QALY: quality-adjusted life year</p> <p>Note: Low-risk is specified as immunocompetent patients without any chronic medical conditions, moderate-risk describes immunocompetent patients with at least one chronic medical condition and high-risk represent immunocompromised/immunosuppressed patients, with or without chronic medical conditions (congenital or acquired).</p> <p>Healthcare system perspective includes medical and vaccination costs; societal perspective includes medical, non-medical, and vaccination costs.</p> |         |        |        |

2

3

4
